# Supplementary material for: Rapid Enzyme-Linked Immunosorbent Assay for the Detection of Hantavirus-Specific Antibodies in Divergent Small Mammals
Source: MDPI journal article supplement (doi:10.3390/v6052028), 2014-05-06

**Supplementary Figure S1.** Reactivity of rodent samples using strip immunoassay. Seropositive samples are labeled with “+” (A); negative control (NC) and positive control (PC) are shown in (B).

**A**

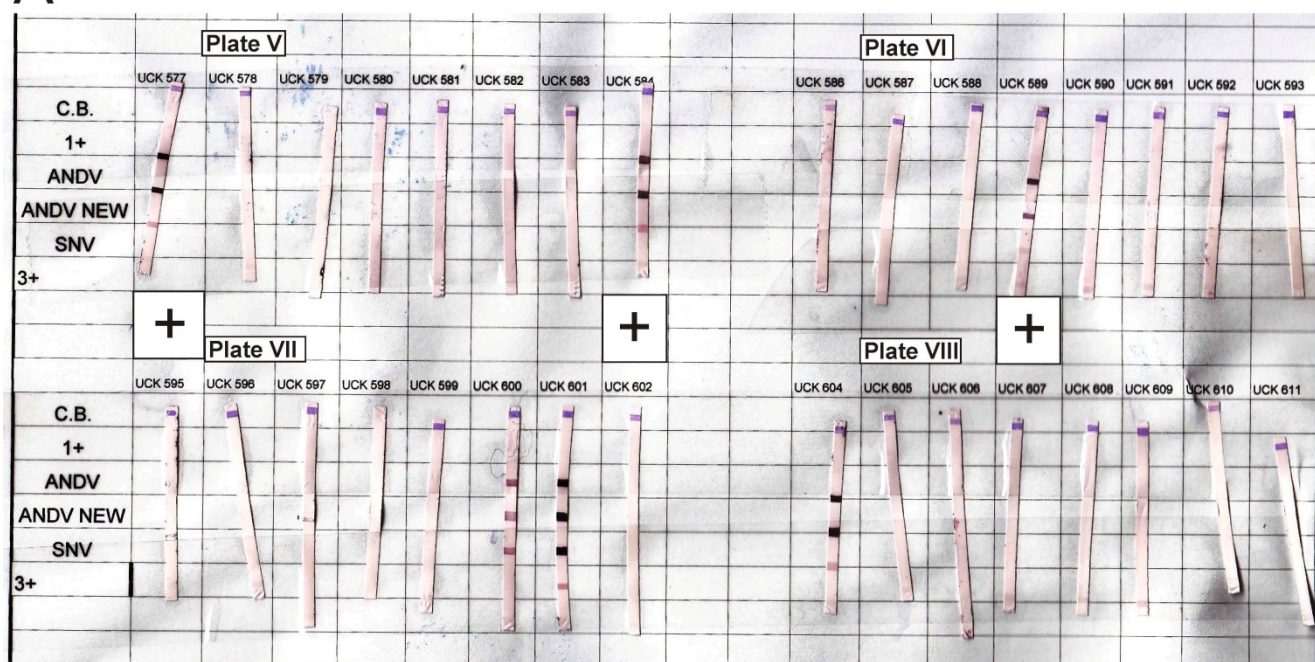

**B**

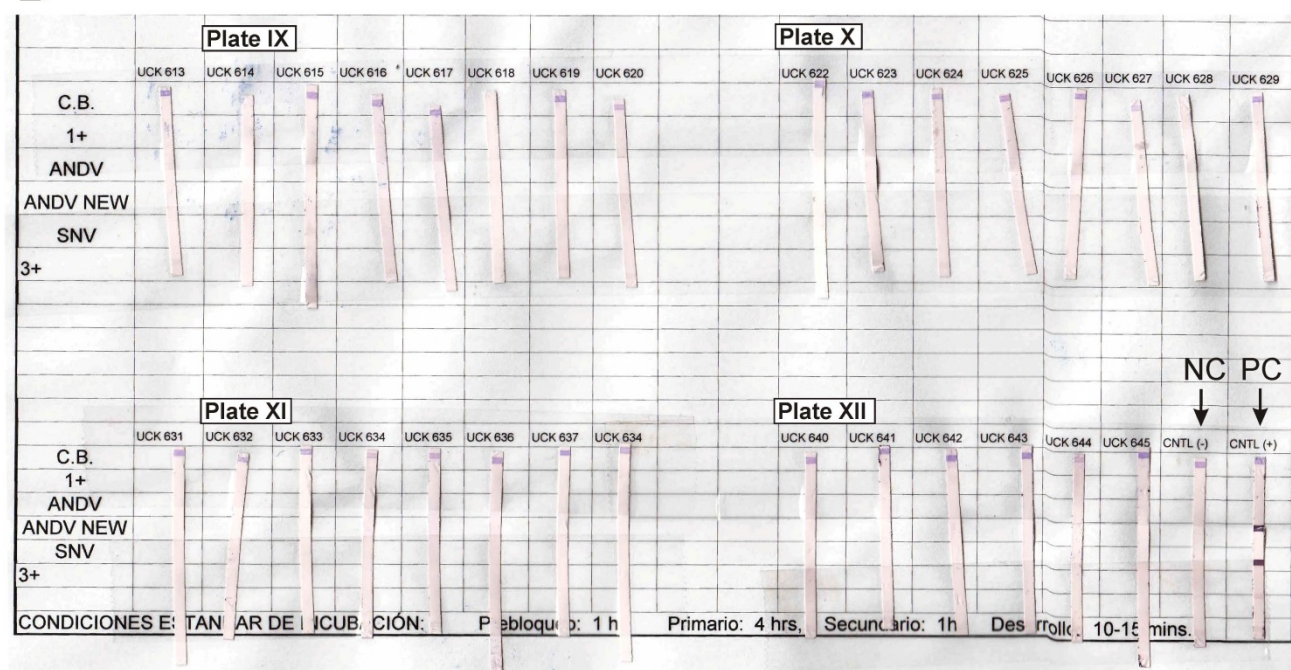

Supplement: s1 [file s1]
